# Supplementary material
Source: MDPI journal article supplement (https://www.mdpi.com/2076-3417/13/17/9893)
Supplement: s1 [file s1]

# Metabolic and Developmental Changes in Insects as Stress-related Response to Electromagnetic Field Exposure

Joanna Wyszowska <sup>1,\*</sup>, Justyna Maliszewska <sup>1</sup> and Piotr Gas <sup>2,\*</sup>

<sup>1</sup> Department of Animal Physiology and Neurobiology, Faculty of Biological and Veterinary Sciences, Nicolaus Copernicus University, Lwowska 1 Street, 87-100, Toruń, Poland; joanna.wyszowska@umk.pl

<sup>2</sup> Department of Electrical and Power Engineering, AGH University of Krakow, Mickiewicza 30 Avenue, 30-059 Krakow, Poland; piotr.gas@agh.edu.pl

\* Correspondence: joanna.wyszowska@umk.pl (J.W.); piotr.gas@agh.edu.pl (P.G.)

**Table S1.** General Linear Mixed Models to test the effect of EMF exposure (treatment: control, 1 mT, 7 mT) on weight loss with time (time, days 1–14) in adult mealworms. The model included a random factor: experimental replicate, within which animals were measured on consecutive days. The dependent variable in the model was the relative weight of insects on consecutive days, expressed as the percentage of the initial weight (on day 0).

| Effect           | df     | F       | P      |
|------------------|--------|---------|--------|
| treatment        | 2, 37  | 0.12    | 0.885  |
| time (covariate) | 1, 388 | 6633.10 | <0.001 |
| interaction      | 2, 388 | 144.34  | <0.001 |

| Post-hoc comparisons     | Treatments     | t     | df  | P      |
|--------------------------|----------------|-------|-----|--------|
| Significance of slopes   | control        | 46.54 | 130 | <0.001 |
| for particular           | 1mT            | 50.24 | 129 | <0.001 |
| treatments               | 7mT            | 47.70 | 129 | <0.001 |
| Comparisons of slopes    | control vs 1mT | 0.29  | 278 | 0.768  |
| among the treatments     | control vs 7mT | 13.70 | 278 | <0.001 |
|                          | 1mT vs 7mT     | 13.71 | 278 | <0.001 |
| Comparisons of           | Control vs 1mT | 0.12  | 18  | 0.904  |
| intercepts among         |                |       |     |        |
| treatments with parallel |                |       |     |        |
| slopes                   |                |       |     |        |

**Table S2.** General Linear Models to test the effect of EMF exposure (treatment: control, 1 mT, 7 mT) on adult mealworm mortality. The dependent variables in the models were days of the occurrence of particular levels of mortality in particular replicates.

| Day of occurrence of: | df    | F    | P     | Post-hoc comparisons |                |            |
|-----------------------|-------|------|-------|----------------------|----------------|------------|
|                       |       |      |       | control vs 1mT       | control vs 7mT | 1mT vs 7mT |
| First dead individual | 2, 27 | 0.21 | 0.811 |                      |                |            |
| 50% mortality         | 2, 27 | 1.03 | 0.369 |                      |                |            |
| 100% mortality        | 2, 27 | 6.51 | 0.005 | 0.690                | 0.003          | 0.007      |

**Table S3.** General Linear Mixed Model to test the effect of EMF exposure (treatment: control, 1 mT, 7 mT) on weight loss with time (time, days 1–7) in larval mealworms. The model included a random factor: experimental replicate, within which animals were measured on consecutive days. The dependent variable in the model was the relative weight of insects on consecutive days, expressed as the percentage of the initial weight (on day 0).

| Effect           | df     | F      | P      |
|------------------|--------|--------|--------|
| treatment        | 2, 33  | 2.04   | 0.146  |
| time (covariate) | 1, 106 | 424.28 | <0.001 |
| interaction      | 2, 106 | 17.27  | <0.001 |

| Post-hoc comparisons   | Treatments     | t     | df  | P      |
|------------------------|----------------|-------|-----|--------|
| Significance of slopes | control        | 15.02 | 139 | <0.001 |
| for particular         | 1mT            | 19.60 | 139 | <0.001 |
| treatments             | 7mT            | 10.97 | 139 | <0.001 |
| Comparisons of slopes  | control vs 1mT | 3.41  | 278 | 0.001  |
| among the treatments   | control vs 7mT | 4.96  | 278 | <0.001 |
|                        | 1mT vs 7mT     | 3.31  | 278 | 0.001  |

**Table S4.** General Linear Mixed Model to test the effect of EMF exposure (treatment: control, 1 mT, 7 mT) on weight loss with time (time, days 1–7) in mealworm pupae. The model included a random factor: experimental replicate, within which animals were measured on consecutive days. The dependent variable in the model was the relative weight of insects on consecutive days, expressed as the percentage of the initial weight (on day 0).

| Effect           | df     | F     | P      |
|------------------|--------|-------|--------|
| treatment        | 2, 25  | 0.23  | 0.796  |
| time (covariate) | 1, 106 | 45.36 | <0.001 |
| interaction      | 2, 106 | 2.21  | 0.115  |

**Table S5.** General or Generalized Linear Models to test the effect of EMF exposure (treatment: control, 1 mT, 7 mT) on metamorphosis success measured as the day of the first emergence of a given subsequent stage (pupa from larva or adult from a pupa) or as a percentage of successfully emerging individuals (relative to the initial number of larvae).

|                          |                               |        | df    | F/ $\chi^2$ | P     |
|--------------------------|-------------------------------|--------|-------|-------------|-------|
| General Linear Model     | Day of the first emergence of | pupae  | 2, 15 | 0.73        | 0.497 |
|                          |                               | adults | 2, 15 | 2.61        | 0.106 |
| Generalized Linear Model | % of successfully emerging    | pupae  | 2     | 1.46        | 0.482 |
|                          |                               | adults | 2     | 2.34        | 0.310 |

**Table S6.** General Linear Mixed Models to test the effect of EMF exposure (treatment: control, 7 mT) on adult and larval mealworm metabolic rate measured as CO<sub>2</sub> production. The model included a random factor: individual, measured 4 consecutive times during the exposure. Time was included as a within-subject factor and individual weight as a covariate to control for its effect on metabolism. The weight and the dependent variable (CO<sub>2</sub> production per individual per unit time) were log-transformed to linearize potentially allometric relationships between weight and metabolism.

|        | <b>Effect</b> | <b>df</b> | <b>F</b> | <b>P</b>     |
|--------|---------------|-----------|----------|--------------|
| larvae | treatment     | 1, 9      | <0.01    | 0.966        |
|        | time          | 3, 11     | 2.51     | 0.110        |
|        | interaction   | 3, 11     | 2.13     | 0.152        |
|        | weight        | 1, 9      | 5.39     | 0.046        |
| adults | treatment     | 1, 8      | 13.90    | <b>0.005</b> |
|        | time          | 3, 13     | 0.79     | 0.518        |
|        | interaction   | 3, 13     | 0.30     | 0.825        |
|        | weight        | 1, 8      | 10.19    | 0.012        |

**Table S7.** General Linear Mixed Model to test the effect of EMF exposure (treatment: control, 7 mT) on sugar content in adult haemolymph. The model included a random factor: replicate (3 replicates with 6 individuals in each).

|           | <b>df</b> | <b>F</b> | <b>P</b> |
|-----------|-----------|----------|----------|
| treatment | 1, 4      | 0.66     | 0.464    |
